# 1 Enzyme specific isotope effects of the Nap and Nar nitrate 2 reductases

3 Ciara K. Asamoto<sup>1</sup>, Kaitlin R. Rempfert<sup>1</sup>, Victoria H. Luu<sup>2</sup>, Adam D. Younkin<sup>1</sup>, Sebastian H.  
4 Kopf<sup>1</sup>

5 <sup>1</sup>Department of Geological Sciences, University of Colorado Boulder, Boulder, CO 80309

6 <sup>2</sup>Department of Geosciences, Princeton University, Princeton, NJ 08544

## 7 8 9 Abstract

10 Dissimilatory nitrate reduction (DNR) to nitrite is the first step in denitrification, the main  
11 process through which bioavailable nitrogen is removed from ecosystems. DNR fractionates the  
12 stable isotopes of nitrogen (<sup>14</sup>N, <sup>15</sup>N) and oxygen (<sup>16</sup>O, <sup>18</sup>O) and thus imparts an isotopic  
13 signature on residual pools of nitrate in many environments. Data on the relationship between the  
14 resulting isotopic pattern in oxygen versus nitrogen isotopes (<sup>18</sup>ε / <sup>15</sup>ε) suggests systematic  
15 differences exist between marine and terrestrial ecosystems that are not fully understood. DNR  
16 can be catalyzed by both cytosolic (Nar) and periplasmic (Nap) nitrate reductases, and previous  
17 work has revealed differences in their <sup>18</sup>ε / <sup>15</sup>ε isotopic signatures. In this study, we thus examine  
18 the <sup>18</sup>ε / <sup>15</sup>ε of six different nitrate-reducing microorganisms that encode Nar, Nap or both  
19 enzymes, as well gene deletion mutants of the enzymes' catalytic subunits (NarG and NapA) to  
20 test the hypothesis that enzymatic differences alone could explain the environmental  
21 observations. We find that the distribution of the <sup>18</sup>ε / <sup>15</sup>ε fractionation ratios of all examined  
22 nitrate reductases form two distinct, non-overlapping peaks centered around a <sup>18</sup>ε / <sup>15</sup>ε  
23 proportionality of 0.55 and a <sup>18</sup>ε / <sup>15</sup>ε proportionality of 0.91, respectively. All Nap reductases  
24 studied to date cluster around the lower proportionality (0.55) and none exceed a <sup>18</sup>ε / <sup>15</sup>ε  
25 proportionality of 0.68. Almost all Nar reductases, on the contrary, cluster tightly around the  
26 higher proportionality (0.91) with no values below a <sup>18</sup>ε / <sup>15</sup>ε proportionality of 0.84 with the  
27 notable exception of the Nar reductases from the genus *Bacillus* which fall around 0.62 and thus  
28 closely resemble the isotopic fingerprints of the Nap reductases. Our findings confirm the  
29 existence of two remarkably distinct isotopic end-members in the dissimilatory nitrate reductases  
30 that could indeed explain differences in coupled N and O isotope fractionation between marine  
31 and terrestrial systems, and almost but not fully match reductase phylogeny.

## 32 **Introduction**

33 Nitrogen is an essential nutrient for life and consequently the availability of nitrogen is a vital  
34 control on ecosystem productivity. Anthropogenic activity has severely altered the natural  
35 balance of the nitrogen cycle. In particular, the use of the Haber-Bosch reaction to synthesize  
36 fertilizers has resulted in excess amounts of nitrate and ammonium being introduced into  
37 ecosystems<sup>1,2</sup>. Assessing the outcomes of excess nitrogen inputs into ecosystems requires a  
38 mechanistic understanding of the competing processes that affect nitrogen cycling in the  
39 environment.

40

41 Fig. 1A highlights key reductive and oxidative steps in the nitrogen cycle, all of which are  
42 catalyzed by microorganisms<sup>3</sup>. The enzymes bacteria use to reduce or oxidize nitrogen  
43 intermediates in the nitrogen cycle impart a kinetic isotope effect on the stable isotopes of  
44 nitrogen (<sup>14</sup>N, <sup>15</sup>N) and oxygen (<sup>16</sup>O, <sup>18</sup>O)<sup>4-9</sup>. Because nitrogen fixation by most nitrogenases  
45 does not impart strong isotopic fractionation<sup>9-13</sup>, redox cycling of fixed nitrogen, especially the  
46 isotopic fractionation associated with dissimilatory nitrate reduction to nitrite, controls the  
47 isotopic composition of bioavailable nitrate in many environmental systems. Dissimilatory  
48 nitrate reduction is the first step for two processes in the nitrogen cycle, denitrification to N<sub>2</sub> and  
49 dissimilatory nitrate reduction to ammonium (DNRA, also referred to as nitrate ammonification)  
50 (Fig. 1A). Although these processes serve different roles, both impact the isotopic composition  
51 of residual nitrate in ecosystems through the nitrate reduction step.

52

53

54

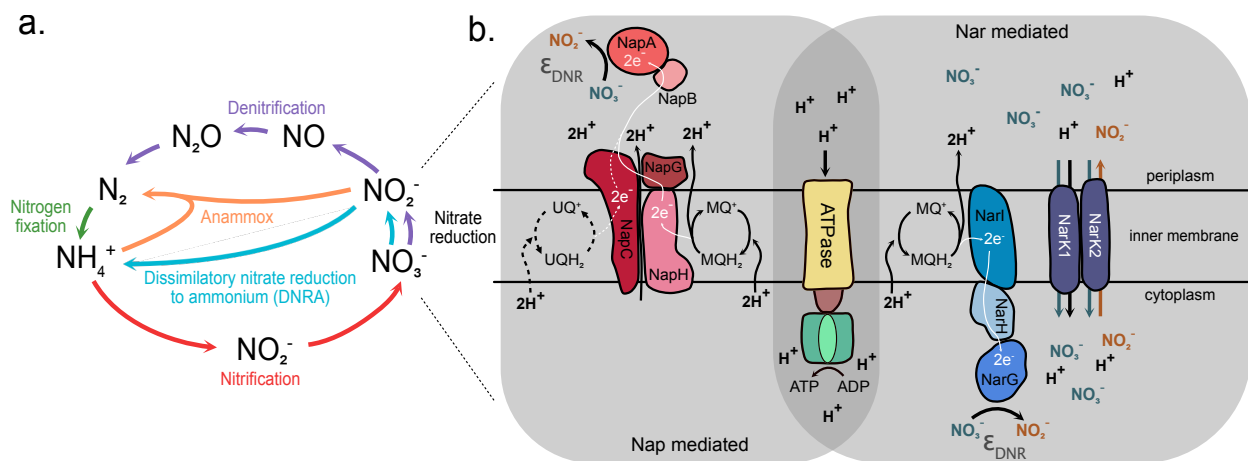

55

56

57 **Fig. 1-** (Top left) An overview of the nitrogen cycle with focus on the dissimilatory nitrate  
 58 reduction step. (Right) The schematic highlights differences for how nitrate reduction is  
 59 catalyzed in Nap versus Nar enzymes. Isotope fractionation ( $\epsilon_{DNR}$ ) occurs during the reduction of  
 60 nitrate to nitrite. White lines indicate the direction of electron transfer. Black lines indicate  
 61 proton translocation. In the case of Nap reductases, there are two main potential pathways for  
 62 nitrate reduction to occur. Bacteria may express NapABC (dashed lines), where NapC oxidizes  
 63 ubiquinol (UQH<sub>2</sub>) to ubiquinone (UQ<sup>+</sup>), liberating two protons and two electrons. The electrons  
 64 are transferred to NapB then NapA. Alternatively, a bacterium may express NapABCGH (solid  
 65 lines). Here NapH oxidizes menaquinol (MQH<sub>2</sub>) to menaquinone (MQ<sup>+</sup>) and the electrons have  
 66 an additional transfer step from NapG to NapC, translocating two additional protons. The Nar  
 67 reductase uses NarI to oxidize UQH<sub>2</sub> to UQ<sup>+</sup> and transfers electrons to NarH then NarG. NarK1  
 68 is a symporter that transports nitrate into the cytoplasm with a proton. NarK2 is an antiporter that  
 69 couples the import of nitrate to the export of nitrite.

70

71 The proportionality of N and O isotope fractionation ( $^{18}\epsilon / ^{15}\epsilon$ ) associated with nitrate reduction  
 72 in marine ecosystems generally follows a proportionality of 0.9 to 1.0<sup>14-19</sup>. In terrestrial  
 73 ecosystems, observational data with coupled N and O isotope measurements is more limited  
 74 (summarized in Fig. 2) but the existing data suggests that the  $^{18}\epsilon / ^{15}\epsilon$  proportionality covers a  
 75 broader and generally lower range of values between 0.5 to 0.7<sup>20-26</sup>. To date, these systematic  
 76 differences in  $^{18}\epsilon / ^{15}\epsilon$  proportionality are not fully understood and may indicate that we are  
 77 missing a key feature about how nitrogen cycling processes create the isotopic signatures of  
 78 nitrate observed in nature. Biogeochemical modelling and recent culturing work suggest that the  
 79 terrestrial observations of low  $^{18}\epsilon / ^{15}\epsilon$  values could be the result of oxidative overprinting of the  
 80 isotopic signal of nitrate reduction by a combination of nitrate producing processes such as  
 81 anaerobic ammonium oxidation (anammox), nitrification, and enzymatic reversibility during  
 82 nitrate reduction<sup>8,27</sup>. However, an alternative hypothesis first proposed by Granger *et al.* (2008)

83 suggests that differences in the  $^{18}\epsilon / ^{15}\epsilon$  proportionality observed in nature could actually be a  
84 consequence of enzymatic differences during nitrate reduction.

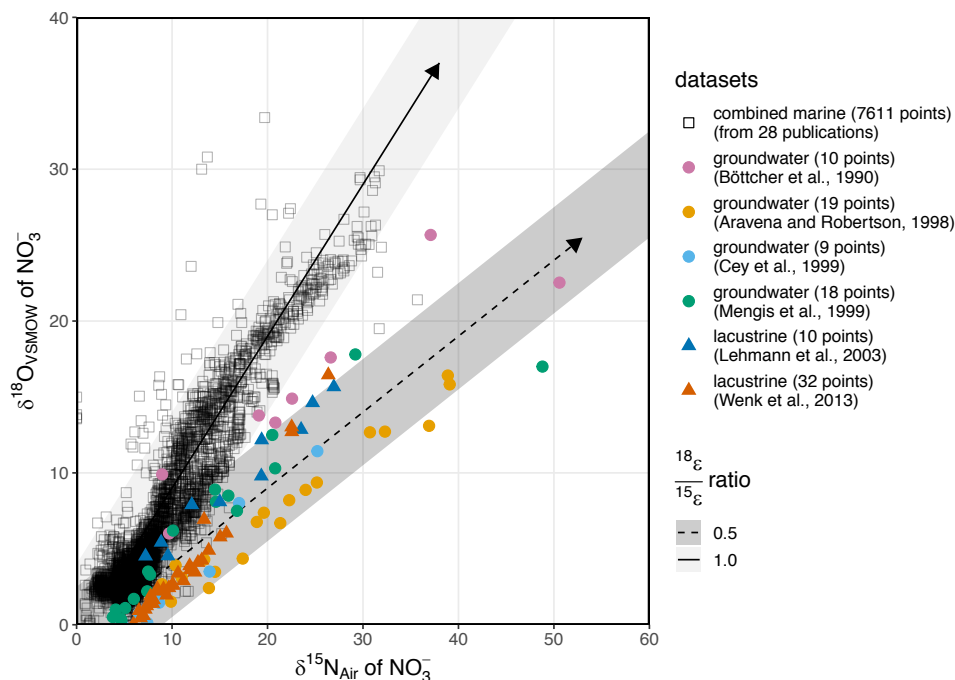

85  
86 **Fig. 2-** A compilation of nitrate isotopic data collected from environmental samples subset into  
87 marine and terrestrial/ freshwater ecosystems. Solid lines and dashed lines indicate  $^{18}\epsilon / ^{15}\epsilon$   
88 proportionalities of 1.0 and 0.5, respectively, with gray shaded bands showing a range of  
89 possible intercepts. See SI for details on the literature data.

90  
91 Dissimilatory nitrate reduction can be catalyzed by the periplasmic enzyme Nap (catalytic  
92 subunit NapA) and the membrane bound cytosolic enzyme Nar (catalytic subunit narG). Bacteria  
93 can harbor either or both of these nitrate reductases<sup>28–30</sup> and neither is linked exclusively to  
94 either denitrification or DNRA. The few studies that have specifically examined the isotope  
95 effects of Nap reductases<sup>7,31,32</sup> indicate that Nap N isotope fractionation ( $^{15}\epsilon$ ) ranges from 11.4–  
96 39.8‰, overlapping with that of Nar reductases (6.6–31.6‰). However, the proportionality  
97 between O and N isotope fractionation appears to differ between Nap and Nar-based nitrate  
98 reduction. The purple photoheterotroph *Rhodobacter sphaeroides* and the chemotrophic sulfur  
99 oxidizer *Sulfurimonas gotlandica* both have only a Nap reductase and were examined by  
100 Granger et al. (2008); Treibergs & Granger (2017) and Frey et al., 2014, respectively. The  
101 isotopic data from the Nap reductases in these organisms revealed  $^{18}\epsilon / ^{15}\epsilon$  values between 0.57 –  
102 0.68 for *R. sphaeroides* and 0.43 – 0.68 for *S. gotlandica*, in contrast with the  $^{18}\epsilon / ^{15}\epsilon$

103 proportionality of  $\sim 0.9$  in Nar based nitrate reduction<sup>7,32–34</sup>. Here, we present experimental  
104 results based on six different nitrate-reducing microorganisms that encode Nar, Nap or both  
105 enzymes, as well gene deletion mutants of the enzymes' catalytic subunits (NarG and NapA) to  
106 test the hypothesis that differences in  $^{18}\epsilon / ^{15}\epsilon$  proportionality may stem solely from enzymatic  
107 differences and explore the implications of our results for the environmental interpretation of  
108 nitrate isotope signatures.

109

## 110 **Methods**

### 111 *Strains*

112 All strains cultured for this study have either the gene for the cytosolic nitrate reductase (narG),  
113 the gene for the periplasmic nitrate reductase (napA), or both. The strains that have both narG  
114 and napA are *Pseudomonas aeruginosa* PA14 (DSM 19882) and *Paracoccus denitrificans*  
115 PD1222, a derivative of DSM 413<sup>35,36</sup>. The strains with only napA are *Desulfovibrio*  
116 *desulfuricans* DSM 642, *Shewanella loihica* DSM (17748)<sup>37–39</sup>, and a markerless narG deletion  
117 mutant of *P. aeruginosa* PA14<sup>40</sup>, hereafter referred to as PA14  $\Delta$ nar. The strains with only narG  
118 are *Bacillus vireti* (DSM 15602), *Bacillus bataviensis* (DSM 15601)<sup>41</sup>, and a markerless napA  
119 deletion mutant of *P. aeruginosa* PA14, hereafter referred to as PA14  $\Delta$ nap.

120

### 121 *Culturing*

122 PA14 strains were grown at 30°C and 37°C (PA14  $\Delta$ nar) in defined MOPS minimal media  
123 amended with 25mM sodium succinate as the sole carbon source<sup>42</sup>, as well as 25g/L LB broth.  
124 *B. vireti* and *B. bataviensis* were grown at 30°C in 30g/L tryptic soy broth (TSB) amended with  
125 13mM glucose and 11mM sodium succinate<sup>43</sup>. *D. desulfuricans* was grown at 30°C in Postgate's  
126 defined medium<sup>44</sup>, which contains 20mM lactate and 1 g/L yeast extract as carbon sources as  
127 well as sodium thioglycolate (0.1g/ L) as a reductant. *S. loihica* was grown at 30°C in a  
128 phosphate buffered minimal salts medium amended with 5, 25, or 30mM sodium lactate as the  
129 sole carbon source (Yoon et al. 2015). *P. denitrificans* was grown at 30°C in a defined minimal  
130 salts medium amended with 25 mM sodium acetate as the sole carbon source (Hahnke et al.  
131 2014). For all nitrate reduction experiments,  $\text{NaNO}_3^-$  was injected from a concentrated stock  
132 solution into each culture tube. *S. loihica* media was amended with approximately 10mM  $\text{NaNO}_3$

133 in this way and all other media recipes were amended with approximately 25mM NaNO<sub>3</sub>. Exact  
134 concentrations in each sample were confirmed by ion chromatography.

135  
136 For all anaerobic growth experiments, media was sparged with N<sub>2</sub> gas and cultures were  
137 incubated while shaking at 250 rpm in balch tubes containing 20mL of media and 5mL of N<sub>2</sub>  
138 headspace at 1.1bar and sealed with blue butyl rubber stoppers. For aerobic growth, culture tubes  
139 were incubated while shaking at 250rpm. Agar plates for reviving strains from frozen stock were  
140 prepared by amending each media recipe with 15 g/L agar. All strains except *D. desulfuricans*  
141 (an obligate anaerobe) were revived on aerobic agar plates and passaged three times in liquid  
142 medium before inoculating isotope fractionation experiments with 1% culture (v/v). *D.*  
143 *desulfuricans* was inoculated directly from freezer stocks into anaerobic culture medium and  
144 passaged 5 times before inoculating isotope fractionation experiments.

145  
146 *Isotope Fractionation Experiments*

147 All strains were grown in triplicate in their respective media in the presence of nitrate and  
148 sampled at regular intervals for nitrate consumption and nitrate isotopic composition. Growth  
149 was monitored directly in the culture tubes by optical density (OD) using a Spectronic 20  
150 spectrophotometer at a wavelength of 660nm for *B. vireti* and *B. bataviensis*, and 600nm for all  
151 other strains. At each time point, approximately 2mL of sample was withdrawn through the  
152 stopper using a 23-gauge needle attached to a syringe. Syringes were flushed with nitrogen prior  
153 to sampling to preserve the anaerobic environment within the balch tubes. Samples were filter  
154 sterilized with 0.2µm PES filters, aliquoted for later quantification and isotopic analysis, and  
155 stored at -20°C. Aliquots for ion chromatography (IC) were immediately diluted in 0.1M NaOH  
156 (pH 11) to stabilize nitrite. For *P. aeruginosa* and *B. vireti*, the experiment was additionally  
157 repeated in media made from <sup>18</sup>O enriched water (OLM-240-10-1, Cambridge Isotope  
158 Laboratories, Inc.) at a final δ<sup>18</sup>O<sub>water</sub> of approximately +100‰.

159  
160 *Sample Analysis*

161 Nitrate and nitrite concentrations were quantified using a Dionex ICS-6000 Ion Chromatograph  
162 equipped with an IonPac AS11-HC column and a variable wavelength absorbance (UV/Vis)  
163 detector to allow for accurate analyte detection in complex media (LB, TSB). Samples were

164 eluted isocratically with 20mM KOH at a flow rate of 1mL/ minute. Nitrate and nitrite peaks  
165 were measured at a wavelength of 210nm and quantified against laboratory standards prepared in  
166 the same media backgrounds. The N and O isotopic composition of nitrate was determined in the  
167 Sigman Lab at Princeton University using the denitrifier method<sup>47,48</sup> with 20 nmol nitrate per  
168 analysis. Nitrite removal was performed prior to isotopic analysis for all samples with nitrite  
169 concentrations > 1% nitrate using the sulfamic acid method<sup>49</sup>. The isotopic measurements were  
170 calibrated against the potassium nitrate reference standards IAEA-NO3 ( $\delta^{15}\text{N} = 4.7\text{‰}$  vs. air,  
171  $\delta^{18}\text{O} = 25.6\text{‰}$  vs. Vienna Standard Mean Ocean Water (VSMOW)), provided by the  
172 International Atomic Energy Agency and USGS34 ( $\delta^{15}\text{N} = -1.8\text{‰}$  vs. air,  $\delta^{18}\text{O} = -27.9\text{‰}$  vs.  
173 VSMOW) provided by the United States Geological Survey, each measured at two different  
174 concentrations every 8 samples to correct for injection volumes. Analytical runs were corrected  
175 for instrument drift based on an  $\text{N}_2\text{O}$  drift monitoring standard. All isotopic data are reported in  
176 conventional delta notation versus the international reference scales for N (Air) and O  
177 (VSMOW):  $\delta^{15}\text{N} = ([^{15}\text{N}/^{14}\text{N}]_{\text{sample}}/[^{15}\text{N}/^{14}\text{N}]_{\text{air}} - 1)$  and  $\delta^{18}\text{O} = ([^{18}\text{O}/^{16}\text{O}]_{\text{sample}}/[^{18}\text{O}/^{16}\text{O}]_{\text{VSMOW}} -$   
178  $1)$ .  $\delta$  values reported in per mil (‰) are implicitly multiplied by a factor of 1000<sup>50</sup>. The  
179 analytical precision of the nitrate monitoring standard used across all analytical runs was 0.06‰  
180 for  $\delta^{15}\text{N}$  and 0.69‰ for  $\delta^{18}\text{O}$  (1  $\sigma$ , n=33). Additionally, all fractionation experiments were run  
181 using the same nitrate source in different media, thus initial time points across all experiments  
182 provide an estimate of sample analytical precision: 0.07‰ for  $\delta^{15}\text{N}$  and 0.43‰ for  $\delta^{18}\text{O}$  (1  $\sigma$ ,  
183 n=52).

184

### 185 *Calculations*

186 Isotope effects: the nitrate  $\delta^{15}\text{N}$  and  $\delta^{18}\text{O}$  measurements were fit to the following linear equations  
187 to estimate the N and O isotope effects ( $^{15}\epsilon$  and  $^{18}\epsilon$ ) and isotope effect proportionality ( $^{18}\epsilon / ^{15}\epsilon$ )  
188 imparted on nitrate during microbial nitrate reduction from the slope of the regressions<sup>51</sup>:

189

$$190 \quad \ln \left( \frac{\delta^{15}\text{N} + 1}{\delta^{15}\text{N}_{\text{initial}} + 1} \right) = ^{15}\epsilon \cdot \ln(f) \quad \text{Eq. 1}$$

191

192

$$\ln \left( \frac{\delta^{18}O + 1}{\delta^{18}O_{initial} + 1} \right) = {}^{18}\epsilon \cdot \ln(f) \quad \text{Eq. 2}$$

193

$$\ln \left( \frac{\delta^{18}O + 1}{\delta^{18}O_{initial} + 1} \right) = \frac{{}^{18}\epsilon}{{}^{15}\epsilon} \cdot \ln \left( \frac{\delta^{15}N + 1}{\delta^{15}N_{initial} + 1} \right) \quad \text{Eq. 3}$$

194

195 where  $f = [\text{NO}_3^-]/[\text{NO}_3^-]_{\text{initial}}$  is the fraction of nitrate remaining and  $\delta$  and  $\epsilon$  values in per mil (‰)  
196 are implicitly multiplied by a factor of 1000<sup>50</sup>. The errors of the regression slopes were used to  
197 estimate standard errors for  ${}^{15}\epsilon$  (Eq. 1),  ${}^{18}\epsilon$  (Eq. 2), and  ${}^{18}\epsilon / {}^{15}\epsilon$  (Eq. 3). Note that for this  
198 implementation of the Rayleigh distillation model (Eq. 1 & 2), normal kinetic isotope effects  
199 (reflecting higher reaction rates of the lighter isotopes) are negative ( $\epsilon < 0$ ) and are reported as  
200 such in Table S1. The opposite convention with normal kinetic isotope effects reported as  $\epsilon > 0$   
201 is also not uncommon and all comparisons with literature data carefully consider the convention  
202 used in each publication. For visual representation of Eq. 3 in figures, the following more  
203 intuitive but slightly less accurate linearizations were used (Eq. 4 - 6):

204

$$\ln \left( \frac{\delta^{15}N + 1}{\delta^{15}N_{initial} + 1} \right) \approx \delta^{15}N - \delta^{15}N_{initial} = \Delta\delta^{15}N \quad \text{Eq. 4}$$

205

206

$$\ln \left( \frac{\delta^{18}O + 1}{\delta^{18}O_{initial} + 1} \right) \approx \delta^{18}O - \delta^{18}O_{initial} = \Delta\delta^{18}O \quad \text{Eq. 5}$$

207

$$\Delta\delta^{18}O = \frac{{}^{18}\epsilon}{{}^{15}\epsilon} \cdot \Delta\delta^{15}N \quad \text{Eq. 6}$$

208

209 Sequence Alignment and Gene Trees: Amino acid sequences for napA and narG reductase genes  
210 (see Table S2 for details) were aligned using ClustalOmega Multiple Sequence Alignment<sup>52</sup>. A  
211 list of gene accession numbers is available in SI Table 2. Maximum clade credibility gene trees  
212 were constructed using MrBayes' Markov chain Monte Carlo analysis under an inverse gamma  
213 rate variation model with default parameters<sup>53</sup>.

214



## 215 **Results and Discussion**

### 216 *Growth of cultures*

217 Growth rates are recorded in SI Table 1. All growth curves and nitrate consumption data are  
218 depicted in SI Figs. 1 and 2. No quantitative growth curve data was collected for *S. loihica* and  
219 *D. desulfuricans*. While turbidity was detected in *S. loihica*, clumping prevented accurate optical  
220 density measurements. *D. desulfuricans* was grown in Postgate's medium which precipitates iron  
221 sulfides and iron hydroxides, preventing accurate optical density measurements. All strains  
222 consumed nitrate successfully under fully anaerobic conditions, except for PA14  $\Delta$ nar which  
223 required O<sub>2</sub> for growth and only consumed significant quantities of nitrate while also exposed to  
224 air. Nitrate consumption differed by strain and medium and ranged from as fast as ~15mM  
225 nitrate in 8 hours (*B. vireti*) to as slow as 15mM nitrate in 80 hours (PA  $\Delta$ nap). See Fig. S2 for  
226 details.

227  
228 Growth in strains of denitrifying bacteria that cannot perform DNRA (*P. aeruginosa*, *P.*  
229 *denitrificans*) (Fig.1) had little to no nitrite accumulation. However, strains of bacteria that have  
230 the potential to perform DNRA in addition to denitrification (*B. vireti*, *B. bataviensis*, *D.*  
231 *desulfuricans*, *S. loihica*) concentrated nitrite during the experiments (SI Fig. 2). This was  
232 particularly pronounced in *B. vireti* and *B. bataviensis*. Consequently, later timepoints for these  
233 experiments could not be analyzed directly for their nitrate isotopic composition because the  
234 sulfamic acid nitrite removal method is only effective to a 7:1 nitrite:nitrate (mol/mol) mixing  
235 ratio<sup>49</sup>. Nitrate in several of these samples with exceedingly high nitrite/ nitrate ratios was thus  
236 separated from nitrite by ion chromatography coupled to fraction collection to enable isotopic  
237 measurements. The analytical impact of residual nitrite from incomplete nitrite removal by  
238 sulfamic acid is discussed in more detail in the SI.

239  
240 During all time course experiments, decreases in nitrate concentration corresponded to an  
241 increasingly enriched residual nitrate pool (SI Figs. 3, 4). Experimental conditions and <sup>18</sup>ε / <sup>15</sup>ε  
242 proportionality values are summarized in Table 1. <sup>15</sup>ε values ranged from 10.8 – 34.8‰. <sup>18</sup>ε  
243 values ranged from 5.2 – 29.6‰ (SI Table 1). Isotopic data fit a closed system Rayleigh model

244 for isotope fractionation, with data largely conforming to a linear relationship of  $\delta^{15}\text{N}$  or  $\delta^{18}\text{O}$   
 245 versus the natural logarithm of the remaining nitrate (SI Figs. 3, 4).

246

247 **Table 1**- Summary of isotope fractionation experiments. Tracer experiments are included as  
 248 replicates. Standard error calculated from all experimental replicates.

249

| Organism                           | Reductase Gene(s) | Medium   | $^{18}\epsilon / ^{15}\epsilon$ +/- std. err. |
|------------------------------------|-------------------|----------|-----------------------------------------------|
| <i>P. aeruginosa</i> PA14          | both              | LB       | 0.97 +/- 0.02                                 |
| <i>P. aeruginosa</i> PA14          | both              | MOPS     | 0.63 +/- 0.02                                 |
| <i>P. aeruginosa</i> $\Delta$ napA | narG              | LB       | 0.91 +/- 0.01                                 |
| <i>P. aeruginosa</i> $\Delta$ napA | narG              | MOPS     | 0.85 +/- 0.02                                 |
| <i>P. aeruginosa</i> $\Delta$ narG | napA              | LB       | 0.49 +/- 0.00                                 |
| <i>P. denitrificans</i>            | both              | Hahnke   | 0.92 +/- 0.01                                 |
| <i>B. bataviensis</i>              | narG              | TSB      | 0.61 +/- 0.06                                 |
| <i>B. vireti</i>                   | narG              | TSB      | 0.64 +/- 0.04                                 |
| <i>D. desulfuricans</i>            | napA              | Postgate | 0.63 +/- 0.06                                 |
| <i>S. loihica</i>                  | napA              | SL       | 0.55 +/- 0.01                                 |

250

251

252 *Nitrate reductases have enzyme specific  $^{18}\epsilon / ^{15}\epsilon$  coupling*

253 Our data indicate an enzyme specific isotope effect for the Nar and Nap reductases. The PA14  
 254 knock-out nitrate reduction experiments show that the Nap reductase in this organism has an  $^{18}\epsilon /$   
 255  $^{15}\epsilon$  proportionality of 0.49 while that of the Nar reductase in the same organism has a value of  
 256 0.86 – 0.91 (Table 1, Fig. 3). The  $^{18}\text{O}$  tracer experiments confirm that no back reaction of nitrite  
 257 or exchange with ambient water occurred (SI Fig. 6). The PA14  $\Delta$ nar data was substantiated by  
 258 the *D. desulfuricans* and *S. loihica* experiments, with  $^{18}\epsilon / ^{15}\epsilon$  values of 0.63 +/- 0.06 and 0.55  
 259 +/- 0.01, respectively (Table 1; Fig. 4). Together, our data suggest  $^{18}\epsilon / ^{15}\epsilon$  differences can be  
 260 purely enzymatic, challenging the hypothesis that environmental  $^{18}\epsilon / ^{15}\epsilon$  patterns require nitrite  
 261 re-oxidation from enzymatic reversibility, nitrification or anammox<sup>27</sup>. These observations for  $^{18}\epsilon /$   
 262  $^{15}\epsilon$  from nitrate reduction by the Nap reductase in PA14  $\Delta$ nar are similar to all other available  
 263 observations from organisms that naturally have only this reductase, with  $^{18}\epsilon / ^{15}\epsilon$  couplings of  
 264 0.63 and 0.51 observed in *R. sphaeroides* and *S. gotlandica*, respectively<sup>7,31,32</sup> (Fig. 4).

265

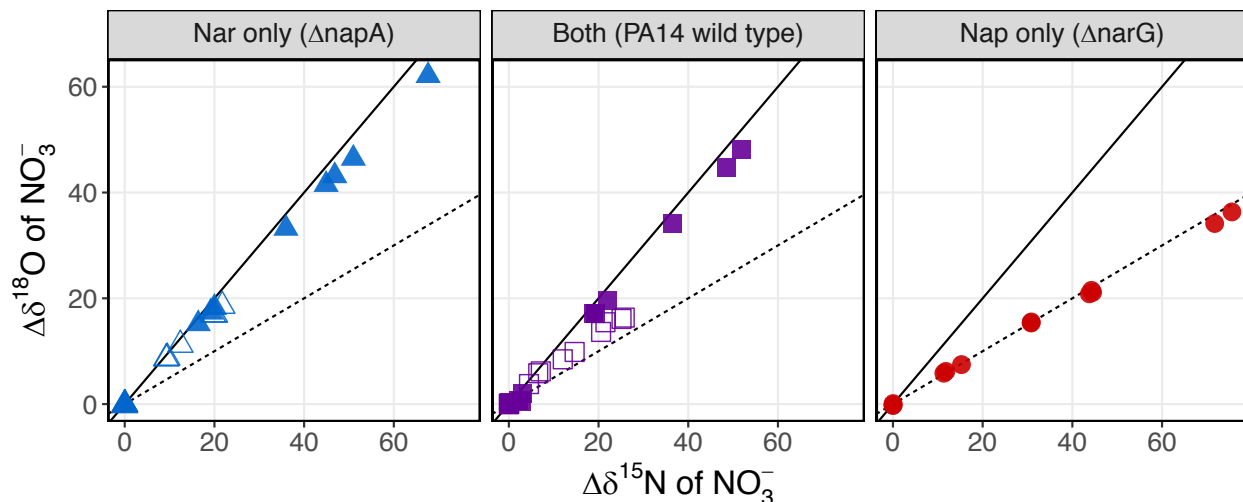

266

267 **Fig. 3-** The change in  $\delta^{18}\text{O}$  plotted versus change in  $\delta^{15}\text{N}$  for the *P. aeruginosa* PA14 wild type  
268 (WT) and mutant experiments. “Nar only” corresponds to the PA14  $\Delta\text{napA}$  strain, and “Nap  
269 only” corresponds to the PA14  $\Delta\text{narG}$  strain. Solid lines and dashed lines indicate  $^{18}\epsilon / ^{15}\epsilon$   
270 proportionalities of 1.0 and 0.5, respectively. Open points indicate cultures grown in MOPS and  
271 filled points indicate cultures grown in LB.

272

273 As discussed above, the PA14  $\Delta\text{nap}$  strain had an  $^{18}\epsilon / ^{15}\epsilon$  proportionality of  $\sim 0.9$  which is  
274 consistent with previous reports from organisms that harbor only Nar (Fig. 4) <sup>7,32–34,54</sup>. Despite  
275 having both nitrate reductases present, *P. denitrificans* has been shown in the literature and in  
276 our own experiments to also have an  $^{18}\epsilon / ^{15}\epsilon$  coupling of  $0.92 \pm 0.01$  <sup>7,32,33</sup>(Fig. 4). Previous  
277 research has demonstrated that *P. denitrificans* PD1222 only uses the Nap reductase under  
278 microaerobic conditions and/ or in the presence of highly reduced carbon sources <sup>55,56</sup>. The  
279 culture conditions for *P. denitrificans* used in this study (completely anaerobic conditions,  
280 relatively oxidized carbon sources) are not conducive to Nap expression based on the literature  
281 data. The  $^{18}\epsilon / ^{15}\epsilon$  signal we observed in our data is therefore consistent with *P. denitrificans* only  
282 reducing nitrate with Nar.

283

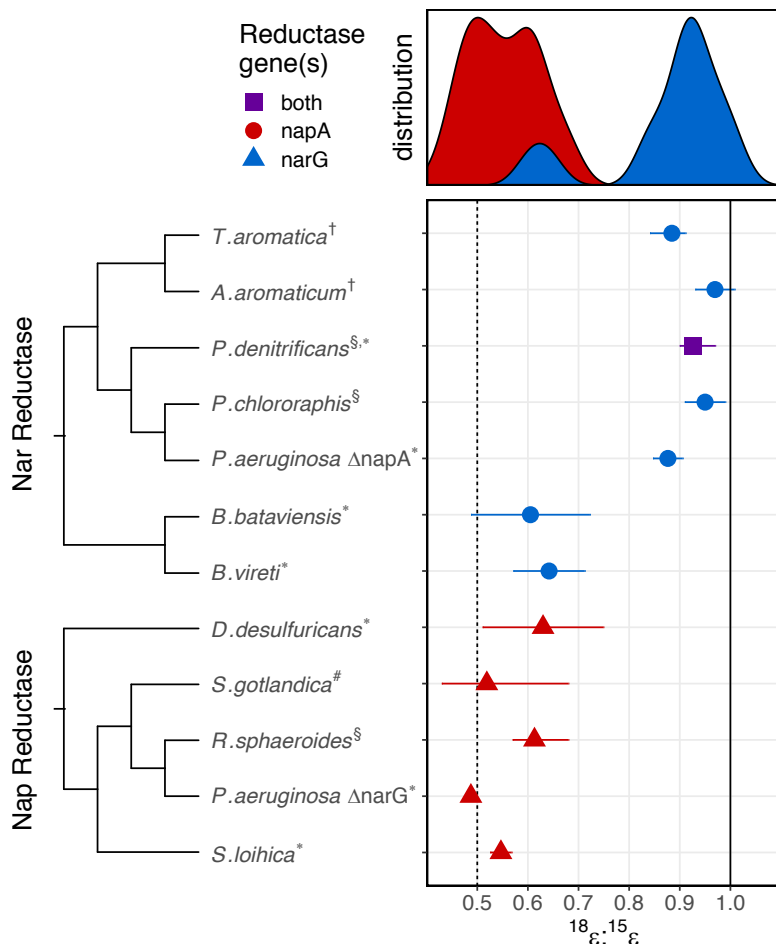

284

285 **Fig. 4-** Maximum clade credibility gene trees of the Nap and Nar reductases and a summary of  
 286 known  $^{18}\epsilon / ^{15}\epsilon$  values (symbols denote averages, error bars denote value ranges if multiple values  
 287 available or +/- 2 standard errors for single values) with a distribution of these ranges shown  
 288 above. Solid line and dashed line indicates  $^{18}\epsilon / ^{15}\epsilon$  of 1.0 and 0.5, respectively. Colors and shapes  
 289 indicate the nitrate reductase that is part of the genome of each strain (blue circles: narG only;  
 290 red triangles: napA only). *P. denitrificans* (purple square) has both genes but under the culturing  
 291 conditions employed only uses narG<sup>57,58</sup>. *E. coli* TMAO reductase used as an outgroup in both  
 292 gene trees. Data collected in this study indicated with an asterisk (\*). Literature data collected  
 293 from (Frey et al., 2014 (#); Granger et al., 2008 (§); Wunderlich et al., 2012 (†)).

294

295 In contrast to all other data on Nar reductases, *B. vireti* and *B. bataviensis* have a significantly  
 296 lower  $^{18}\epsilon / ^{15}\epsilon$ : 0.64 +/- 0.04 and 0.61 +/- 0.06, respectively (Table 1; Fig. 4). Although  $^{18}\epsilon / ^{15}\epsilon$   
 297 values between biological replicates covered a wider range than in other organisms, likely due to  
 298 analytical artifacts from nitrite build-up (see SI discussion on nitrite accumulation), *Bacillus*  $^{18}\epsilon /$   
 299  $^{15}\epsilon$  values were robustly and consistently lower than all other Nar reductases (Fig. 4). Overall,  
 300 the *Bacillus* data indicate that it is possible for some Nar reductases to have distinct and lower  $^{18}\epsilon$

301 /  $^{15}\epsilon$  proportionality, adding to the complexity of interpreting isotopic signals of nitrate reduction  
302 in ecosystems.

303

### 304 *Roles of Nap and Nar reductases*

305 The Nar reductase is known as the primary respiratory reductase amongst denitrifying bacteria.  
306 The nar operon is highly conserved, with narGHI present in every known Nar-bearing denitrifier  
307 <sup>28</sup>. Its singular role is in providing energy conservation under anaerobic conditions where high  
308 levels of nitrate are present. The Nap reductase, however, has been implicated in both aerobic  
309 and traditional anaerobic denitrification, DNRA, redox balancing, nitrate scavenging, and even  
310 magnetite biomineralization <sup>55,56,59-63</sup>. The nap operon is much less conserved, with several  
311 combinations of the eleven different genes found across species <sup>28,30,64,65</sup>. The regulation of these  
312 enzymes also differs. As Nar is distinctly used for respiration, the nar operon is upregulated  
313 under anaerobic conditions and by the presence of nitrate. Nap regulation, however, is more  
314 complicated given the variable operon conformations and assorted functions across species the  
315 Nap reductase can perform. For example, reduced carbon sources can upregulate nap expression  
316 in some Nap-bearing bacteria <sup>55,56,58,66</sup>. Additionally, the presence of either oxygen or nitrate can  
317 up or down-regulate nap expression depending on species <sup>63,67-69</sup>. The gene regulation of these  
318 enzymes thus ties bacterial preference of reducing nitrate with Nar versus Nap to environmental  
319 constraints.

320

321 Bacterial preference of using the Nar or Nap reductase was exemplified in the wild type PA14  
322 strain experiments when grown in different mediums. The wild type PA14 strain grown in  
323 MOPS medium had an  $^{18}\epsilon / ^{15}\epsilon$  proportionality of 0.63 +/- 0.02 (Table 1; Fig. 3). This is a  
324 midpoint value in comparison to the  $^{18}\epsilon / ^{15}\epsilon$  proportionality measured in the PA14  $\Delta$ nap and  
325 PA14  $\Delta$ nar strains and suggests that PA14 was using both nitrate reductases. The Nap reductase  
326 for *P. aeruginosa* is used as a backup redox balancing mechanism, in particular under conditions  
327 where electron acceptors are limiting <sup>70</sup>. When grown in LB, this strain exhibited a higher  $^{18}\epsilon /$   
328  $^{15}\epsilon$  proportionality of 0.97 +/- 0.02 (Table 1). While LB broth is considered a rich medium, it is  
329 actually carbon limited, with mostly amino acids available for uptake <sup>71</sup>. This would cause lower  
330 C/N ratios in contrast to the MOPS minimal medium, in which we provide excess succinate as a

331 carbon source. Past research in *E. coli* has shown that the Nar reductase has a selective advantage  
332 under low carbon and high nitrate concentrations, which is the case in our LB grown cultures <sup>62</sup>.  
333 Furthermore, this effect does not occur in the PA14  $\Delta$ nap strain, suggesting that this is not a  
334 difference in how the Nar reductase performs in LB versus minimal medium, but a change in  
335 expression pattern by PA14 to maximize energy conservation.

336

### 337 *Mechanism for isotopic differences*

338 Regardless of differences in gene regulation, the Nap and Nar reductases still catalyze the same  
339 reaction and yet have different isotope effects. The active site of both reductases are similar, with  
340 both containing a Mo-bis-MGD cofactor and iron sulfur cluster. <sup>28,72</sup>. One distinction is that the  
341 Nar reductase's Mo center is coordinated by an aspartate residue, while the Nap reductase is  
342 coordinated by a cysteine. Cysteine is a more reduced residue that may impact the redox  
343 potential of the Mo center, affecting how nitrate is bound and reduced <sup>73-75</sup>. Studies indicate that  
344 Nap generally has a higher affinity for nitrate than Nar <sup>62,76-78</sup>. Furthermore, the base of its  
345 substrate channel is lined with positively charged amino acid residues that guides nitrate to the  
346 active site <sup>74,79</sup>. In contrast, Nar has a substrate channel with negatively charged residues that  
347 may impact the rate of nitrate binding overall <sup>80</sup>. Thus, it is possible that the root of isotopic  
348 differences lies within the nitrate molecule's interaction with the active site of these enzymes.

349

350 Additionally, it has been proposed that nitrate binds to the catalytic site of Nap and Nar  
351 differently. For the Nar reductase, the general mechanism for nitrate binding allows nitrate to  
352 bind either Mo(V) or Mo(IV), such that an internal electron transfer may be required before the  
353 nitrate molecule can be reduced by Nar <sup>81,82</sup>. This is in contrast to the Nap reductase where  
354 nitrate binds molybdenum only in the reduced state, Mo(IV), and reduces the nitrate immediately  
355 <sup>65,74</sup>. Frey *et al.* (2014) suggested that this may cause a difference in isotope fractionation as the  
356 Nar reductase may be subject to an intramolecular isotope effect. While the precise mechanism  
357 of nitrate binding and reduction for both Nap and Nar are still uncertain, the Nap reductase's  
358 high affinity for nitrate and its faster reduction mechanism may be key in understanding the  
359 differences in <sup>18</sup> $\epsilon$  / <sup>15</sup> $\epsilon$  proportionality. Contrary to expectations, our results for the *Bacillus*  
360 experiments indicate that a Nap-like isotopic signature with respect to <sup>18</sup> $\epsilon$  / <sup>15</sup> $\epsilon$  proportionality is  
361 possible in a Nar-reductase. Future work on the structural differences between the *Bacillus* and

362 other Nar reductases may hold the key to uncovering the mechanistic basis for these isotopic  
363 differences.

364

### 365 *Interpreting $^{18}\epsilon / ^{15}\epsilon$ coupling in ecosystems*

366 Our research shows that nitrate reduction by Nap reductases consistently produces  $^{18}\epsilon / ^{15}\epsilon$   
367 proportionality values that are lower than those observed in marine ecosystems and may explain  
368 the  $^{18}\epsilon / ^{15}\epsilon$  signals observed in terrestrial ecosystems. The isotopic data sets collected for the  
369 terrestrial data in Fig. 2 come from a diverse set of ecosystems ranging from soils to lakes to  
370 riparian zones and groundwater runoff from agriculture (see SI for details). Soils in particular  
371 can have a large range of redox gradients contained within a few centimeters and experience  
372 drastic changes in moisture on short time scales, impacting oxygen availability<sup>83</sup>.

373 In comparison, marine systems operate at larger scales and experience less heterogeneity over  
374 short spatial and temporal scales with dissimilatory nitrate reduction occurring predominately in  
375 oxygen minimum zones (OMZ) and anoxic sediments<sup>14–17,19</sup>. The nar operon has a much  
376 narrower regulatory range of permissible environmental conditions than the nap operon and,  
377 unlike the latter, is always inhibited by the presence of O<sub>2</sub><sup>84–86</sup>, which may explain the  
378 predominance of nar-based nitrate reduction in stable low oxygen systems like OMZs<sup>87,88</sup>. It is  
379 thus conceivable that the Nap reductase's multiple functions are more suitable for maintaining  
380 bacterial homeostasis in terrestrial aquatic ecosystems that can fluctuate significantly over short  
381 spatial and temporal timescales.

382

383 Though this hypothesis may appear at odds with the established assumption that the Nap  
384 reductase is used less commonly than the Nar reductase, limited data is available on Nap versus  
385 Nar use in nature. Work by Bru *et al.*<sup>89</sup> and Smith *et al.*<sup>90</sup> indicate that Nap and Nar gene copy  
386 numbers are roughly equivalent throughout various terrestrial and freshwater environments.  
387 Further, slurry incubation experiments performed by Dong *et al.*<sup>91</sup> indicated that the Nap  
388 reductase was more commonly used in one of the three communities of denitrifiers surveyed.  
389 While similar studies specifically targeting Nap and Nar gene abundances have not been carried  
390 out in marine ecosystems, at minimum this data indicates that the Nap reductase serves an  
391 important role in nitrate reduction for bacteria and that its expression is comparable to Nar in  
392 freshwater and terrestrial ecosystems.

393  
394 Since the Nap reductase is not embedded in the cytosolic membrane, and thus not directly  
395 involved in proton motive force (PMF) generation, it is frequently presumed to be rarely used for  
396 respiration. This explains the common assumption that the isotopic signal of nitrate reduction in  
397 ecosystems must stem mainly from the membrane bound cytosolic Nar reductase, as PMF  
398 generation is essential for survival and growth<sup>7,14,17,32,33</sup>. However, the potential to perform  
399 nitrate reduction with only a Nap reductase appears to be common place, and with the right  
400 auxiliary genes present in the nap operon, can be just as efficient as the Nar reductase at  
401 producing a proton motive force (PMF) (Fig. 1B)<sup>59,65,92</sup>. Future work combining isotopic  
402 measurements with quantification of gene expression patterns of the Nap and Nar reductases in  
403 different environments can connect our culture-based results back to the trends originally  
404 observed in nature. This will be critical when considering the potential impact and extent of  
405 *Bacillus*-like Nar enzymes in nature that may have lower  $^{18}\epsilon / ^{15}\epsilon$  values. The regulation patterns  
406 observed in the PA14 wild type strain in MOPS versus LB medium also emphasize the  
407 importance of performing transcriptomics over metagenomics, as bacteria with both reductases  
408 may switch between Nap and Nar depending on environmental constraints. This is particularly  
409 important when considering processes such as DNRA which can use either NapA or NarG to  
410 reduce nitrate. Though the Nap reductase is often implicated as the main reductase used during  
411 DNRA, many species of bacteria appear to catalyze DNRA solely via the Nar reductase<sup>43,93-95</sup>.  
412 The data presented in this study provides a clear indication that even closely related enzymes can  
413 have very distinct isotopic signatures that may allow more comprehensive interpretations of  
414 environmental data in the future.

415

## 416 **Acknowledgements**

417 This research was supported by the Department of Geological Sciences at the University of  
418 Colorado Boulder and a NASA Exobiology grant (80NSSC17K0667) to SHK. We would like to  
419 thank Daniel Sigman for support and access to analytical instrumentation at Princeton  
420 University. We are grateful to Emma Kast, Dario Marconi, Sergey Oleynik and other members  
421 of the Sigman Lab for providing guidance and support throughout sample processing and  
422 isotopic analysis. We also sincerely thank the Dietrich Lab for providing us with the *P.*  
423 *aeruginosa* mutant strains.

424

425



## 426 References

- 427
- 428 (1) Gruber, N.; Galloway, J. N. An Earth-System Perspective of the Global Nitrogen Cycle.  
429 *Nature* **2008**, *451* (7176), 293–296. <https://doi.org/10.1038/nature06592>.
- 430 (2) Haber, F. The Synthesis of Ammonia from Its Elements, Nobel Lecture. *Resonance* **1920**, *7*  
431 (9), 86–94. <https://doi.org/10.1007/BF02836189>.
- 432 (3) Simon, J.; Klotz, M. G. Diversity and Evolution of Bioenergetic Systems Involved in  
433 Microbial Nitrogen Compound Transformations. *Biochim. Biophys. Acta BBA - Bioenerg.*  
434 **2013**, *1827* (2), 114–135. <https://doi.org/10.1016/j.bbabi.2012.07.005>.
- 435 (4) Brunner, B.; Contreras, S.; Lehmann, M. F.; Matantseva, O.; Rollog, M.; Kalvelage, T.;  
436 Klockgether, G.; Lavik, G.; Jetten, M. S. M.; Kartal, B.; Kuypers, M. M. M. Nitrogen  
437 Isotope Effects Induced by Anammox Bacteria. *Proc. Natl. Acad. Sci.* **2013**, *110* (47),  
438 18994–18999. <https://doi.org/10.1073/pnas.1310488110>.
- 439 (5) Buchwald, C.; Casciotti, K. L. Oxygen Isotopic Fractionation and Exchange during Bacterial  
440 Nitrite Oxidation. *Limnol. Oceanogr.* **2010**, *55* (3), 1064–1074.  
441 <https://doi.org/10.4319/lo.2010.55.3.1064>.
- 442 (6) Casciotti, K. L. Inverse Kinetic Isotope Fractionation during Bacterial Nitrite Oxidation.  
443 *Geochim. Cosmochim. Acta* **2009**, *73* (7), 2061–2076.  
444 <https://doi.org/10.1016/j.gca.2008.12.022>.
- 445 (7) Granger, J.; Sigman, D. M.; Lehmann, M. F.; Tortell, P. D. Nitrogen and Oxygen Isotope  
446 Fractionation during Dissimilatory Nitrate Reduction by Denitrifying Bacteria. *Limnol.*  
447 *Oceanogr.* **2008**, *53* (6), 2533–2545. <https://doi.org/10.4319/lo.2008.53.6.2533>.
- 448 (8) Kobayashi, K.; Makabe, A.; Yano, M.; Oshiki, M.; Kindaichi, T.; Casciotti, K. L.; Okabe, S.  
449 Dual Nitrogen and Oxygen Isotope Fractionation during Anaerobic Ammonium Oxidation  
450 by Anammox Bacteria. *ISME J.* **2019**, *13* (10), 2426–2436.  
451 <https://doi.org/10.1038/s41396-019-0440-x>.
- 452 (9) Zhang, X.; Sigman, D. M.; Morel, F. M. M.; Kraepiel, A. M. L. Nitrogen Isotope  
453 Fractionation by Alternative Nitrogenases and Past Ocean Anoxia. *Proc. Natl. Acad. Sci.*  
454 **2014**, *111* (13), 4782–4787. <https://doi.org/10.1073/pnas.1402976111>.
- 455 (10) Bauersachs, T.; Schouten, S.; Compaoré, J.; Wollenzien, U.; Stal, L. J.; Sinninghe  
456 Damsteé, J. S. Nitrogen Isotopic Fractionation Associated with Growth on Dinitrogen Gas  
457 and Nitrate by Cyanobacteria. *Limnol. Oceanogr.* **2009**, *54* (4), 1403–1411.
- 458 (11) Carpenter, E. J.; Harvey, H. R.; Fry, B.; Capone, D. G. Biogeochemical Tracers of the  
459 Marine Cyanobacterium *Trichodesmium*. *Deep Sea Res. Part Oceanogr. Res. Pap.* **1997**,  
460 *44* (1), 27–38.
- 461 (12) Macko, S. A.; Fogel, M. L.; Hare, P. E.; Hoering, T. C. Isotopic Fractionation of Nitrogen  
462 and Carbon in the Synthesis of Amino Acids by Microorganisms. *Chem Geol* **1987**, *65*  
463 (1), 79–92.
- 464 (13) Minagawa, M.; Wada, E. Nitrogen Isotope Ratios of Red Tide Organisms in the East  
465 China Sea: A Characterization of Biological Nitrogen Fixation. *Mar. Chem.* **1986**, *19* (3),  
466 245–259.
- 467 (14) Bourbonnais, A.; Letscher, R. T.; Bange, H. W.; Échevin, V.; Larkum, J.; Mohn, J.;  
468 Yoshida, N.; Altabet, M. A. N<sub>2</sub>O Production and Consumption from Stable Isotopic and  
469 Concentration Data in the Peruvian Coastal Upwelling System: N<sub>2</sub>O Production and  
470 Consumption off Peru. *Glob. Biogeochem. Cycles* **2017**, *31* (4), 678–698.  
471 <https://doi.org/10.1002/2016GB005567>.

- 472 (15) Casciotti, K. L.; Buchwald, C.; McIlvin, M. Implications of Nitrate and Nitrite Isotopic  
473 Measurements for the Mechanisms of Nitrogen Cycling in the Peru Oxygen Deficient  
474 Zone. *Deep Sea Res. Part Oceanogr. Res. Pap.* **2013**, *80*, 78–93.  
475 <https://doi.org/10.1016/j.dsr.2013.05.017>.
- 476 (16) Casciotti, K. L.; McIlvin, M. R. Isotopic Analyses of Nitrate and Nitrite from Reference  
477 Mixtures and Application to Eastern Tropical North Pacific Waters. *Mar. Chem.* **2007**,  
478 *107* (2), 184–201. <https://doi.org/10.1016/j.marchem.2007.06.021>.
- 479 (17) DiFiore, P. J.; Sigman, D. M.; Dunbar, R. B. Upper Ocean Nitrogen Fluxes in the Polar  
480 Antarctic Zone: Constraints from the Nitrogen and Oxygen Isotopes of Nitrate: POLAR  
481 ANTARCTIC NITRATE N AND O ISOTOPES. *Geochem. Geophys. Geosystems* **2009**,  
482 *10* (11), n/a-n/a. <https://doi.org/10.1029/2009GC002468>.
- 483 (18) Gaye, B.; Nagel, B.; Dähnke, K.; Rixen, T.; Emeis, K.-C. Evidence of Parallel  
484 Denitrification and Nitrite Oxidation in the ODZ of the Arabian Sea from Paired Stable  
485 Isotopes of Nitrate and Nitrite. *Glob. Biogeochem. Cycles* **2013**, *27* (4), 1059–1071.  
486 <https://doi.org/10.1002/2011GB004115>.
- 487 (19) Rafter, P. A.; DiFiore, P. J.; Sigman, D. M. Coupled Nitrate Nitrogen and Oxygen  
488 Isotopes and Organic Matter Remineralization in the Southern and Pacific Oceans: Nitrate  
489 Isotopes and Remineralization. *J. Geophys. Res. Oceans* **2013**, *118* (10), 4781–4794.  
490 <https://doi.org/10.1002/jgrc.20316>.
- 491 (20) Aravena, R.; Robertson, W. D. Use of Multiple Isotope Tracers to Evaluate Denitrification  
492 in Ground Water: Study of Nitrate from a Large-Flux Septic System Plume. *Ground*  
493 *Water* **1998**, *36* (6), 975–982.
- 494 (21) Böttcher, J.; Strelbel, O.; Voerkelius, S.; Schmidt, H.-L. Using Isotope Fractionation of  
495 Nitrate-Nitrogen and Nitrate-Oxygen for Evaluation of Microbial Denitrification in a  
496 Sandy Aquifer. *J. Hydrol.* **1990**, *114* (3–4), 413–424. [https://doi.org/10.1016/0022-](https://doi.org/10.1016/0022-1694(90)90068-9)  
497 [1694\(90\)90068-9](https://doi.org/10.1016/0022-1694(90)90068-9).
- 498 (22) Houlton, B. Z.; Sigman, D. M.; Hedin, L. O. Isotopic Evidence for Large Gaseous  
499 Nitrogen Losses from Tropical Rainforests. *Proc. Natl. Acad. Sci.* **2006**, *103* (23), 8745–  
500 8750. <https://doi.org/10.1073/pnas.0510185103>.
- 501 (23) Mengis, M.; Schiff, S. L.; Harris, M.; English, M. C.; Aravena, R.; Elgood, R. J.;  
502 MacLean, A. Multiple Geochemical and Isotopic Approaches for Assessing Ground Water  
503 NO<sub>3</sub>- Elimination in a Riparian Zone. *Ground Water* **1999**, *37* (3), 448–457.
- 504 (24) Wenk, C. B.; Zopfi, J.; Bles, J.; Veronesi, M.; Niemann, H.; Lehmann, M. F. Community  
505 N and O Isotope Fractionation by Sulfide-Dependent Denitrification and Anammox in a  
506 Stratified Lacustrine Water Column. *Geochim. Cosmochim. Acta* **2014**, *125*, 551–563.  
507 <https://doi.org/10.1016/j.gca.2013.10.034>.
- 508 (25) Lehmann, M. F.; Reichert, P.; Bernasconi, S. M.; Barbieri, A.; McKenzie, J. A. Modelling  
509 Nitrogen and Oxygen Isotope Fractionation during Denitrification in a Lacustrine Redox-  
510 Transition Zone. *Geochim. Cosmochim. Acta* **2003**, *67* (14), 2529–2542.  
511 [https://doi.org/10.1016/S0016-7037\(03\)00085-1](https://doi.org/10.1016/S0016-7037(03)00085-1).
- 512 (26) Cey, E. E.; Rudolph, D. L.; Aravena, R.; Parkin, G. Role of the Riparian Zone in  
513 Controlling the Distribution and Fate of Agricultural Nitrogen near a Small Stream in  
514 Southern Ontario. *J. Contam. Hydrol.* **1999**, *37* (1–2), 45–67.
- 515 (27) Granger, J.; Wankel, S. D. Isotopic Overprinting of Nitrification on Denitrification as a  
516 Ubiquitous and Unifying Feature of Environmental Nitrogen Cycling. *Proc. Natl. Acad.*  
517 *Sci.* **2016**, *113* (42), E6391–E6400. <https://doi.org/10.1073/pnas.1601383113>.

- 518 (28) González, P. J.; Correia, C.; Moura, I.; Brondino, C. D.; Moura, J. J. G. Bacterial Nitrate  
519 Reductases: Molecular and Biological Aspects of Nitrate Reduction. *J. Inorg. Biochem.*  
520 **2006**, *100* (5–6), 1015–1023. <https://doi.org/10.1016/j.jinorgbio.2005.11.024>.
- 521 (29) Philippot, L. Denitrifying Genes in Bacterial and Archaeal Genomes. *Biochim. Biophys.*  
522 *Acta BBA - Gene Struct. Expr.* **2002**, *1577* (3), 355–376. [https://doi.org/10.1016/S0167-  
523 \*4781\(02\)00420-7\*.](https://doi.org/10.1016/S0167-4781(02)00420-7)
- 524 (30) Richardson, D. J.; Berks, B. C.; Russell, D. A.; Spiro, S.; Taylor, C. J. Functional,  
525 Biochemical and Genetic Diversity of Prokaryotic Nitrate Reductases: *Cell. Mol. Life Sci.*  
526 **2001**, *58* (2), 165–178. <https://doi.org/10.1007/PL00000845>.
- 527 (31) Frey, C.; Hietanen, S.; Jürgens, K.; Labrenz, M.; Voss, M. N and O Isotope Fractionation  
528 in Nitrate during Chemolithoautotrophic Denitrification by *Sulfurimonas Gotlandica*.  
529 *Environ. Sci. Technol.* **2014**, *48* (22), 13229–13237. <https://doi.org/10.1021/es503456g>.
- 530 (32) Treibergs, L. A.; Granger, J. Enzyme Level N and O Isotope Effects of Assimilatory and  
531 Dissimilatory Nitrate Reduction. *Limnol. Oceanogr.* **2017**, *62* (1), 272–288.  
532 <https://doi.org/10.1002/lno.10393>.
- 533 (33) Kritee, K.; Sigman, D. M.; Granger, J.; Ward, B. B.; Jayakumar, A.; Deutsch, C. Reduced  
534 Isotope Fractionation by Denitrification under Conditions Relevant to the Ocean.  
535 *Geochim. Cosmochim. Acta* **2012**, *92*, 243–259. <https://doi.org/10.1016/j.gca.2012.05.020>.
- 536 (34) Wunderlich, A.; Meckenstock, R.; Einsiedl, F. Effect of Different Carbon Substrates on  
537 Nitrate Stable Isotope Fractionation During Microbial Denitrification. *Environ. Sci.*  
538 *Technol.* **2012**, *46* (9), 4861–4868. <https://doi.org/10.1021/es204075b>.
- 539 (35) Rahme, L.; Stevens, E.; Wolfort, S.; Shao, J.; Tompkins, R.; Ausubel, F. Common  
540 Virulence Factors for Bacterial Pathogenicity in Plants and Animals. *Science* **1995**, *268*  
541 (5219), 1899–1902. <https://doi.org/10.1126/science.7604262>.
- 542 (36) Rainey, F. A.; Stakebrandt, E.; Brghardt, J. A Re-Evaluation of the Taxonomy of  
543 *Paracoccus Denitrificans* and a Proposal for the Combination *Paracoccus Pantotrophus*  
544 *Comb. Nov. Int. J. Syst. Bacteriol.* **1999**, *49* (2), 645–651.
- 545 (37) Beijerinck, M. W. Über *Spirillum Desulfuricans* Als Ursache von Sulfatreduktion.  
546 *Zentralblatt Bakteriologie* **1895**, *1*, 1–9.
- 547 (38) Gao, H. *Shewanella Loihica* Sp. Nov., Isolated from Iron-Rich Microbial Mats in the  
548 Pacific Ocean. *Int. J. Syst. Evol. Microbiol.* **2006**, *56* (8), 1911–1916.  
549 <https://doi.org/10.1099/ijs.0.64354-0>.
- 550 (39) Kluyver, A. J.; Bernardus Van Niel, C. Prospects for a Natural System of Classification of  
551 Bacteria. *Zentralblatt Bakteriologie. Parasitenkd. Infekt. Hyg.* **1936**, *94*, 369–403.
- 552 (40) Dietrich, L. E. P.; Okegbe, C.; Price-Whelan, A.; Sakhtah, H.; Hunter, R. C.; Newman, D.  
553 K. Bacterial Community Morphogenesis Is Intimately Linked to the Intracellular Redox  
554 State. *J. Bacteriol.* **2013**, *195* (7), 1371–1380. <https://doi.org/10.1128/JB.02273-12>.
- 555 (41) Heyrman, J.; Vanparys, B.; Logan, N. A.; Balcaen, A.; Rodríguez-Díaz, M.; Felske, A.;  
556 De Vos, P. *Bacillus Novalis* Sp. Nov., *Bacillus Vireti* Sp. Nov., *Bacillus Soli* Sp. Nov.,  
557 *Bacillus Bataviensis* Sp. Nov. and *Bacillus Drentensis* Sp. Nov., from the Drentse A  
558 Grasslands. *Int. J. Syst. Evol. Microbiol.* **2004**, *54* (1), 47–57.  
559 <https://doi.org/10.1099/ijs.0.02723-0>.
- 560 (42) Neidhardt, F. C.; Bloch, P. L.; Smith, D. F. Culture Medium for Enterobacteria. *J.*  
561 *Bacteriol.* **1974**, *119* (3), 736–747. <https://doi.org/10.1128/JB.119.3.736-747.1974>.
- 562 (43) Mania, D.; Heylen, K.; van Spanning, R. J. M.; Frostegård, Å. The Nitrate-Ammonifying  
563 and *NosZ* -Carrying Bacterium *B. Acillus Vireti* Is a Potent Source and Sink for Nitric and

- 564 Nitrous Oxide under High Nitrate Conditions: *Bacillus Vireti* Is a Source and Sink for NO  
565 and N<sub>2</sub> O. *Environ. Microbiol.* **2014**, *16* (10), 3196–3210. <https://doi.org/10.1111/1462->  
566 2920.12478.
- 567 (44) Postgate, J. R. Versatile Medium for the Enumeration of Sulfate-Reducing Bacteria. *Appl.*  
568 *Microbiol.* **1963**, *11* (3), 265–267. <https://doi.org/10.1128/AEM.11.3.265-267.1963>.
- 569 (45) Yoon, S.; Cruz-García, C.; Sanford, R.; Ritalahti, K. M.; Löffler, F. E. Denitrification  
570 versus Respiratory Ammonification: Environmental Controls of Two Competing  
571 Dissimilatory NO<sub>3</sub><sup>-</sup>/NO<sub>2</sub><sup>-</sup> Reduction Pathways in *Shewanella Loihica* Strain PV-4.  
572 *ISME J.* **2015**, *9* (5), 1093–1104. <https://doi.org/10.1038/ismej.2014.201>.
- 573 (46) Hahnke, S. M.; Moosmann, P.; Erb, T. J.; Strous, M. An Improved Medium for the  
574 Anaerobic Growth of *Paracoccus Denitrificans* Pd1222. *Front. Microbiol.* **2014**, *5*.  
575 <https://doi.org/10.3389/fmicb.2014.00018>.
- 576 (47) Sigman, D. M.; Casciotti, K. L.; Andreani, M.; Barford, C.; Galanter, M.; Böhlke, J. K. A  
577 Bacterial Method for the Nitrogen Isotopic Analysis of Nitrate in Seawater and  
578 Freshwater. *Anal. Chem.* **2001**, *73* (17), 4145–4153. <https://doi.org/10.1021/ac010088e>.
- 579 (48) Weigand, M. A.; Foriel, J.; Barnett, B.; Oleynik, S.; Sigman, D. M. Updates to  
580 Instrumentation and Protocols for Isotopic Analysis of Nitrate by the Denitrifier Method:  
581 Denitrifier Method Protocols and Instrumentation Updates. *Rapid Commun. Mass*  
582 *Spectrom.* **2016**, *30* (12), 1365–1383. <https://doi.org/10.1002/rcm.7570>.
- 583 (49) Granger, J.; Sigman, D. M. Removal of Nitrite with Sulfamic Acid for Nitrate N and O  
584 Isotope Analysis with the Denitrifier Method. *Rapid Commun. Mass Spectrom.* **2009**, *23*  
585 (23), 3753–3762. <https://doi.org/10.1002/rcm.4307>.
- 586 (50) Coplen, T. B. Guidelines and Recommended Terms for Expression of Stable-Isotope-  
587 Ratio and Gas-Ratio Measurement Results: Guidelines and Recommended Terms for  
588 Expressing Stable Isotope Results. *Rapid Commun. Mass Spectrom.* **2011**, *25* (17), 2538–  
589 2560. <https://doi.org/10.1002/rcm.5129>.
- 590 (51) Mariotti, A.; Germon, J. C.; Hubert, P.; Kaiser, P.; Letolle, R.; Tardieux, A.; Tardieux, P.  
591 Experimental Determination of Nitrogen Kinetic Isotope Fractionation: Some Principles;  
592 Illustration for the Denitrification and Nitrification Processes. *Plant Soil* **1981**, *62* (3),  
593 413–430. <https://doi.org/10.1007/BF02374138>.
- 594 (52) Sievers, F.; Wilm, A.; Dineen, D.; Gibson, T. J.; Karplus, K.; Li, W.; Lopez, R.;  
595 McWilliam, H.; Remmert, M.; Söding, J.; Thompson, J. D.; Higgins, D. G. Fast, Scalable  
596 Generation of High-Quality Protein Multiple Sequence Alignments Using Clustal Omega.  
597 *Mol. Syst. Biol.* **2011**, *7*.
- 598 (53) Huelsenbeck, J. P.; Ronquist, F. MRBAYES: Bayesian Inference of Phylogenetic Trees.  
599 *Bioinformatics* **2001**, *17* (8), 754–755. <https://doi.org/10.1093/bioinformatics/17.8.754>.
- 600 (54) Carlisle, E.; Yarnes, C.; Toney, M. D.; Bloom, A. J. Nitrate Reductase <sup>15</sup>N Discrimination  
601 in *Arabidopsis Thaliana*, *Zea Mays*, *Aspergillus Niger*, *Picea Angusta*, and *Escherichia*  
602 *Coli*. *Front. Plant Sci.* **2014**, *5*. <https://doi.org/10.3389/fpls.2014.00317>.
- 603 (55) Ellington, M. J. K.; Bhakoo, K. K.; Sawers, G.; Richardson, D. J.; Ferguson, S. J.  
604 Hierarchy of Carbon Source Selection in *Paracoccus Pantotrophus*: Strict Correlation  
605 between Reduction State of the Carbon Substrate and Aerobic Expression of the Nap  
606 Operon. *J. Bacteriol.* **2002**, *184* (17), 4767–4774. <https://doi.org/10.1128/JB.184.17.4767->  
607 4774.2002.
- 608 (56) Sears, H. J.; Sawers, G.; Berks, B. C.; Ferguson, S. J.; Richardson, D. J. Control of  
609 Periplasmic Nitrate Reductase Gene Expression (NapEDABC) from *Paracoccus*

- 610 Pantotrophus in Response to Oxygen and Carbon Substrates. *Microbiology* **2000**, *146*  
611 (11), 2977–2985. <https://doi.org/10.1099/00221287-146-11-2977>.
- 612 (57) Sears, H. J.; Spiro, S.; Richardson, D. J. Effect of Carbon Substrate and Aeration on  
613 Nitrate Reduction and Expression of the Periplasmic and Membrane-Bound Nitrate  
614 Reductases in Carbon-Limited Continuous Cultures of *Paracoccus Denitrificans* Pd1222.  
615 *Microbiology* **1997**, *143*, 3767–3774.
- 616 (58) Sears, H. J.; Ferguson, S. J.; Richardson, D. J.; Spiro, S. The Identification of a  
617 Periplasmic Nitrate Reductase in *Paracoccus Denitrificans*. *FEMS Microbiol. Lett.* **1993**,  
618 *113* (1), 107–111. <https://doi.org/10.1111/j.1574-6968.1993.tb06496.x>.
- 619 (59) Bedzyk, L.; Wang, T.; Ye, R. W. The Periplasmic Nitrate Reductase In *Pseudomonas* Sp.  
620 Strain G-179 Catalyzes the First Step of Denitrification. *J. Bacteriol.* **1999**, *181* (9), 2802–  
621 2806. <https://doi.org/10.1128/JB.181.9.2802-2806.1999>.
- 622 (60) Ji, B.; Yang, K.; Zhu, L.; Jiang, Y.; Wang, H.; Zhou, J.; Zhang, H. Aerobic  
623 Denitrification: A Review of Important Advances of the Last 30 Years. *Biotechnol.*  
624 *Bioprocess Eng.* **2015**, *20* (4), 643–651. <https://doi.org/10.1007/s12257-015-0009-0>.
- 625 (61) Li, Y.; Katzmann, E.; Borg, S.; Schüler, D. The Periplasmic Nitrate Reductase Nap Is  
626 Required for Anaerobic Growth and Involved in Redox Control of Magnetite  
627 Biomineralization in *Magnetospirillum Gryphiswaldense*. *J. Bacteriol.* **2012**, *194* (18),  
628 4847–4856. <https://doi.org/10.1128/JB.00903-12>.
- 629 (62) Potter, L. C.; Millington, P.; Griffiths, L.; Thomas, G. H.; Cole, J. A. Competition between  
630 *Escherichia Coli* Strains Expressing Either a Periplasmic or a Membrane-Bound Nitrate  
631 Reductase : Does Nap Confer a Selective Advantage during Nitrate-Limited Growth? *Int.*  
632 *J. Syst. Bacteriol.* **1999**, *344* (1), 77–84.
- 633 (63) Stewart, V.; Lu, Y.; Darwin, A. J. Periplasmic Nitrate Reductase (NapABC Enzyme)  
634 Supports Anaerobic Respiration by *Escherichia Coli* K-12. *J. Bacteriol.* **2002**, *184* (5),  
635 1314–1323. <https://doi.org/10.1128/JB.184.5.1314-1323.2002>.
- 636 (64) Kraft, B.; Strous, M.; Tegetmeyer, H. E. Microbial Nitrate Respiration – Genes, Enzymes  
637 and Environmental Distribution. *J. Biotechnol.* **2011**, *155* (1), 104–117.  
638 <https://doi.org/10.1016/j.jbiotec.2010.12.025>.
- 639 (65) Sparacino-Watkins, C.; Stolz, J. F.; Basu, P. Nitrate and Periplasmic Nitrate Reductases.  
640 *Chem Soc Rev* **2014**, *43* (2), 676–706. <https://doi.org/10.1039/C3CS60249D>.
- 641 (66) Dong, Y.; Wang, J.; Fu, H.; Zhou, G.; Shi, M.; Gao, H. A Crp-Dependent Two-  
642 Component System Regulates Nitrate and Nitrite Respiration in *Shewanella Oneidensis*.  
643 *PLoS ONE* **2012**, *7* (12), e51643. <https://doi.org/10.1371/journal.pone.0051643>.
- 644 (67) Mesa, S.; Hauser, F.; Friberg, M.; Malaguti, E.; Fischer, H.-M.; Hennecke, H.  
645 Comprehensive Assessment of the Regulons Controlled by the FixLJ-FixK2-FixK1  
646 Cascade in *Bradyrhizobium Japonicum*. *J. Bacteriol.* **2008**, *190* (20), 6568–6579.  
647 <https://doi.org/10.1128/JB.00748-08>.
- 648 (68) Robles, E. F.; Sánchez, C.; Bonnard, N.; Delgado, M. J.; Bedmar, E. J. The  
649 *Bradyrhizobium Japonicum* NapEDABC Genes Are Controlled by the FixLJ-FixK2-NnrR  
650 Regulatory Cascade. *Biochem. Soc. Trans.* **2006**, *34* (1), 108–110.  
651 <https://doi.org/10.1042/BST0340108>.
- 652 (69) Stewart, V. Regulation of Nitrate and Nitrite Reductase Synthesis in Enterobacteria.  
653 *Antonie Van Leeuwenhoek* **1994**, *66* (1–3), 37–45. <https://doi.org/10.1007/BF00871631>.
- 654 (70) Lin, Y.-C.; Sekedat, M. D.; Cornell, W. C.; Silva, G. M.; Okegbe, C.; Price-Whelan, A.;  
655 Vogel, C.; Dietrich, L. E. P. Phenazines Regulate Nap-Dependent Denitrification in

- 656 *Pseudomonas Aeruginosa* Biofilms. *J. Bacteriol.* **2018**, *200* (9), e00031-18,  
657 /jb/200/9/e00031-18.atom. <https://doi.org/10.1128/JB.00031-18>.
- 658 (71) Sezonov, G.; Joseleau-Petit, D.; D'Ari, R. Escherichia Coli Physiology in Luria-Bertani  
659 Broth. *J. Bacteriol.* **2007**, *189* (23), 8746–8749. <https://doi.org/10.1128/JB.01368-07>.
- 660 (72) Morozkina, E. V.; Zvyagilskaya, R. A. Nitrate Reductases: Structure, Functions, and  
661 Effect of Stress Factors. *Biochem. Mosc.* **2007**, *72* (10), 1151–1160.  
662 <https://doi.org/10.1134/S0006297907100124>.
- 663 (73) Barford, D. The Role of Cysteine Residues as Redox-Sensitive Regulatory Switches. *Curr.*  
664 *Opin. Struct. Biol.* **2004**, *14* (6), 679–686. <https://doi.org/10.1016/j.sbi.2004.09.012>.
- 665 (74) Coelho, C.; Romão, M. J. Structural and Mechanistic Insights on Nitrate Reductases.  
666 *Protein Sci.* **2015**, *24* (12), 1901–1911. <https://doi.org/10.1002/pro.2801>.
- 667 (75) Wirtz, M.; Droux, M. Synthesis of the Sulfur Amino Acids: Cysteine and Methionine.  
668 *Photosynth. Res.* **2005**, *86* (3), 345–362. <https://doi.org/10.1007/s11120-005-8810-9>.
- 669 (76) Arnoux, P.; Sabaty, M.; Alric, J.; Frangioni, B.; Guigliarelli, B.; Adriano, J.-M.; Pignol, D.  
670 Structural and Redox Plasticity in the Heterodimeric Periplasmic Nitrate Reductase. *Nat.*  
671 *Struct. Mol. Biol.* **2003**, *10* (11), 928–934. <https://doi.org/10.1038/nsb994>.
- 672 (77) Gates, A. J.; Richardson, D. J.; Butt, J. N. Voltammetric Characterization of the Aerobic  
673 Energy-Dissipating Nitrate Reductase of *Paracoccus Pantotrophus*: Exploring the Activity  
674 of a Redox-Balancing Enzyme as a Function of Electrochemical Potential. *Biochem. J.*  
675 **2008**, *409* (1), 159–168. <https://doi.org/10.1042/BJ20071088>.
- 676 (78) Pinho, D.; Besson, S.; Silva, P. J.; de Castro, B.; Moura, I. Isolation and Spectroscopic  
677 Characterization of the Membrane-Bound Nitrate Reductase from *Pseudomonas*  
678 *Chlororaphis* DSM 50135. *Biochim. Biophys. Acta BBA - Gen. Subj.* **2005**, *1723* (1–3),  
679 151–162. <https://doi.org/10.1016/j.bbagen.2005.02.008>.
- 680 (79) Najmudin, S.; González, P. J.; Trincão, J.; Coelho, C.; Mukhopadhyay, A.; Cerqueira, N.  
681 M. F. S. A.; Romão, C. C.; Moura, I.; Moura, J. J. G.; Brondino, C. D.; Romão, M. J.  
682 Periplasmic Nitrate Reductase Revisited: A Sulfur Atom Completes the Sixth  
683 Coordination of the Catalytic Molybdenum. *JBIC J. Biol. Inorg. Chem.* **2008**, *13* (5), 737–  
684 753. <https://doi.org/10.1007/s00775-008-0359-6>.
- 685 (80) Jormakka, M.; Richardson, D.; Byrne, B.; Iwata, S. Architecture of NarGH Reveals a  
686 Structural Classification of Mo-BisMGD Enzymes. *Structure* **2004**, *12* (1), 95–104.  
687 <https://doi.org/10.1016/j.str.2003.11.020>.
- 688 (81) Anderson, L. J.; Richardson, D. J.; Butt, J. N. Catalytic Protein Film Voltammetry from a  
689 Respiratory Nitrate Reductase Provides Evidence for Complex Electrochemical  
690 Modulation of Enzyme Activity †. *Biochemistry* **2001**, *40* (38), 11294–11307.  
691 <https://doi.org/10.1021/bi002706b>.
- 692 (82) Marangon, J.; Paes de Sousa, P. M.; Moura, I.; Brondino, C. D.; Moura, J. J. G.; González,  
693 P. J. Substrate-Dependent Modulation of the Enzymatic Catalytic Activity: Reduction of  
694 Nitrate, Chlorate and Perchlorate by Respiratory Nitrate Reductase from *Marinobacter*  
695 *Hydrocarbonoclasticus* 617. *Biochim. Biophys. Acta BBA - Bioenerg.* **2012**, *1817* (7),  
696 1072–1082. <https://doi.org/10.1016/j.bbabi.2012.04.011>.
- 697 (83) Husson, O. Redox Potential (Eh) and PH as Drivers of Soil/Plant/Microorganism Systems:  
698 A Transdisciplinary Overview Pointing to Integrative Opportunities for Agronomy. *Plant*  
699 *Soil* **2013**, *362* (1–2), 389–417. <https://doi.org/10.1007/s11104-012-1429-7>.
- 700 (84) Spiro, S.; Guest, J. R. FNR and Its Role in Oxygen-Regulated Gene Expression in  
701 *Escherichia Coli*. *FEMS Microbiol. Rev.* **1990**, *6* (4), 399–428.

- 702 (85) Moir, J. W. B.; Wood, N. J. Nitrate and Nitrite Transport in Bacteria: *Cell. Mol. Life Sci.*  
703 **2001**, 58 (2), 215–224. <https://doi.org/10.1007/PL00000849>.
- 704 (86) Wood, N. J.; Alizadeh, T.; Bennett, S.; Pearce, J.; Ferguson, S. J.; Richardson, D. J.; Moir,  
705 J. W. B. Maximal Expression of Membrane-Bound Nitrate Reductase in *Paracoccus* Is  
706 Induced by Nitrate via a Third FNR-Like Regulator Named NarR. *J. Bacteriol.* **2001**, 183  
707 (12), 3606–3613. <https://doi.org/10.1128/JB.183.12.3606-3613.2001>.
- 708 (87) Lam, P.; Kuypers, M. M. M. Microbial Nitrogen Cycling Processes in Oxygen Minimum  
709 Zones. *Annu. Rev. Mar. Sci.* **2011**, 3 (1), 317–345. [https://doi.org/10.1146/annurev-](https://doi.org/10.1146/annurev-marine-120709-142814)  
710 [marine-120709-142814](https://doi.org/10.1146/annurev-marine-120709-142814).
- 711 (88) Ulloa, O.; Canfield, D. E.; DeLong, E. F.; Letelier, R. M.; Stewart, F. J. Microbial  
712 Oceanography of Anoxic Oxygen Minimum Zones. *Proc. Natl. Acad. Sci.* **2012**, 109 (40),  
713 15996–16003. <https://doi.org/10.1073/pnas.1205009109>.
- 714 (89) Bru, D.; Sarr, A.; Philippot, L. Relative Abundances of Proteobacterial Membrane-Bound  
715 and Periplasmic Nitrate Reductases in Selected Environments. *Appl. Environ. Microbiol.*  
716 **2007**, 73 (18), 5971–5974. <https://doi.org/10.1128/AEM.00643-07>.
- 717 (90) Smith, C. J.; Nedwell, D. B.; Dong, L. F.; Osborn, A. M. Diversity and Abundance of  
718 Nitrate Reductase Genes (NarG and NapA), Nitrite Reductase Genes (NirS and NrfA), and  
719 Their Transcripts in Estuarine Sediments. *Appl. Environ. Microbiol.* **2007**, 73 (11), 3612–  
720 3622. <https://doi.org/10.1128/AEM.02894-06>.
- 721 (91) Dong, L. F.; Smith, C. J.; Papaspyrou, S.; Stott, A.; Osborn, A. M.; Nedwell, D. B.  
722 Changes in Benthic Denitrification, Nitrate Ammonification, and Anammox Process Rates  
723 and Nitrate and Nitrite Reductase Gene Abundances along an Estuarine Nutrient Gradient  
724 (the Colne Estuary, United Kingdom). *Appl. Environ. Microbiol.* **2009**, 75 (10), 3171–  
725 3179. <https://doi.org/10.1128/AEM.02511-08>.
- 726 (92) Chen, Y.; Wang, F.; Xu, J.; Mehmood, M. A.; Xiao, X. Physiological and Evolutionary  
727 Studies of NAP Systems in *Shewanella* Piezotolerans WP3. *ISME J.* **2011**, 5 (5), 843–855.  
728 <https://doi.org/10.1038/ismej.2010.182>.
- 729 (93) Heylen, K.; Keltjens, J. Redundancy and Modularity in Membrane-Associated  
730 Dissimilatory Nitrate Reduction in *Bacillus*. *Front. Microbiol.* **2012**, 3.  
731 <https://doi.org/10.3389/fmicb.2012.00371>.
- 732 (94) Kiss, H.; Lang, E.; Lapidus, A.; Copeland, A.; Nolan, M.; Glavina Del Rio, T.; Chen, F.;  
733 Lucas, S.; Tice, H.; Cheng, J.-F.; Han, C.; Goodwin, L.; Pitluck, S.; Liolios, K.; Pati, A.;  
734 Ivanova, N.; Mavromatis, K.; Chen, A.; Palaniappan, K.; Land, M.; Hauser, L.; Chang,  
735 Y.-J.; Jeffries, C. D.; Detter, J. C.; Brettin, T.; Spring, S.; Rohde, M.; Göker, M.; Woyke,  
736 T.; Bristow, J.; Eisen, J. A.; Markowitz, V.; Hugenholtz, P.; Kyrpides, N. C.; Klenk, H.-P.  
737 Complete Genome Sequence of *Denitrovibrio* *Acetiphilus* Type Strain (N2460T). *Stand.*  
738 *Genomic Sci.* **2010**, 2 (3), 270–279. <https://doi.org/10.4056/sigs.892105>.
- 739 (95) Rusmana, I.; Nedwell, D. B. Use of Chlorate as a Selective Inhibitor to Distinguish  
740 Membrane-Bound Nitrate Reductase (Nar) and Periplasmic Nitrate Reductase (Nap) of  
741 Dissimilative Nitrate Reducing Bacteria in Sediment. *FEMS Microbiol. Ecol.* **2004**, 48 (3),  
742 379–386. <https://doi.org/10.1016/j.femsec.2004.02.010>.
- 743  
744
